# Supplementary material for: Marine-freshwater prokaryotic transitions require extensive changes in the predicted proteome
Source: PubMed Central journal article supplement (PMC6706942; doi:10.1186/s40168-019-0731-5), 2019-08-22
Supplement: 40168_2019_731_MOESM1_ESM.pdf [file 40168_2019_731_MOESM1_ESM.pdf]

## Additional file 1

# Marine-freshwater prokaryotic transitions require extensive changes in the predicted proteome

**Pedro J. Cabello-Yeves<sup>1</sup> and Francisco Rodríguez-Valera<sup>1\*</sup>**

<sup>1</sup> Evolutionary Genomics Group, Departamento de Producción Vegetal y Microbiología, Universidad Miguel Hernández, San Juan de Alicante, 03550 Alicante, Spain.

\*Correspondence: Francisco Rodríguez-Valera, E-mail: [frvalera@umh.es](mailto:frvalera@umh.es)

Phone +34-965919313, Fax +34-965 919457

**Keywords:** Isoelectric point, marine-freshwater transition, metaproteome, acid shift, electrostatic surface potential.

**Running title:** Marine-freshwater transitions predicted proteome

**This PDF file includes:** Figs. S1 to S10.

**Other Additional files for this manuscript include the following:**

Additional files 2 and 3

**A**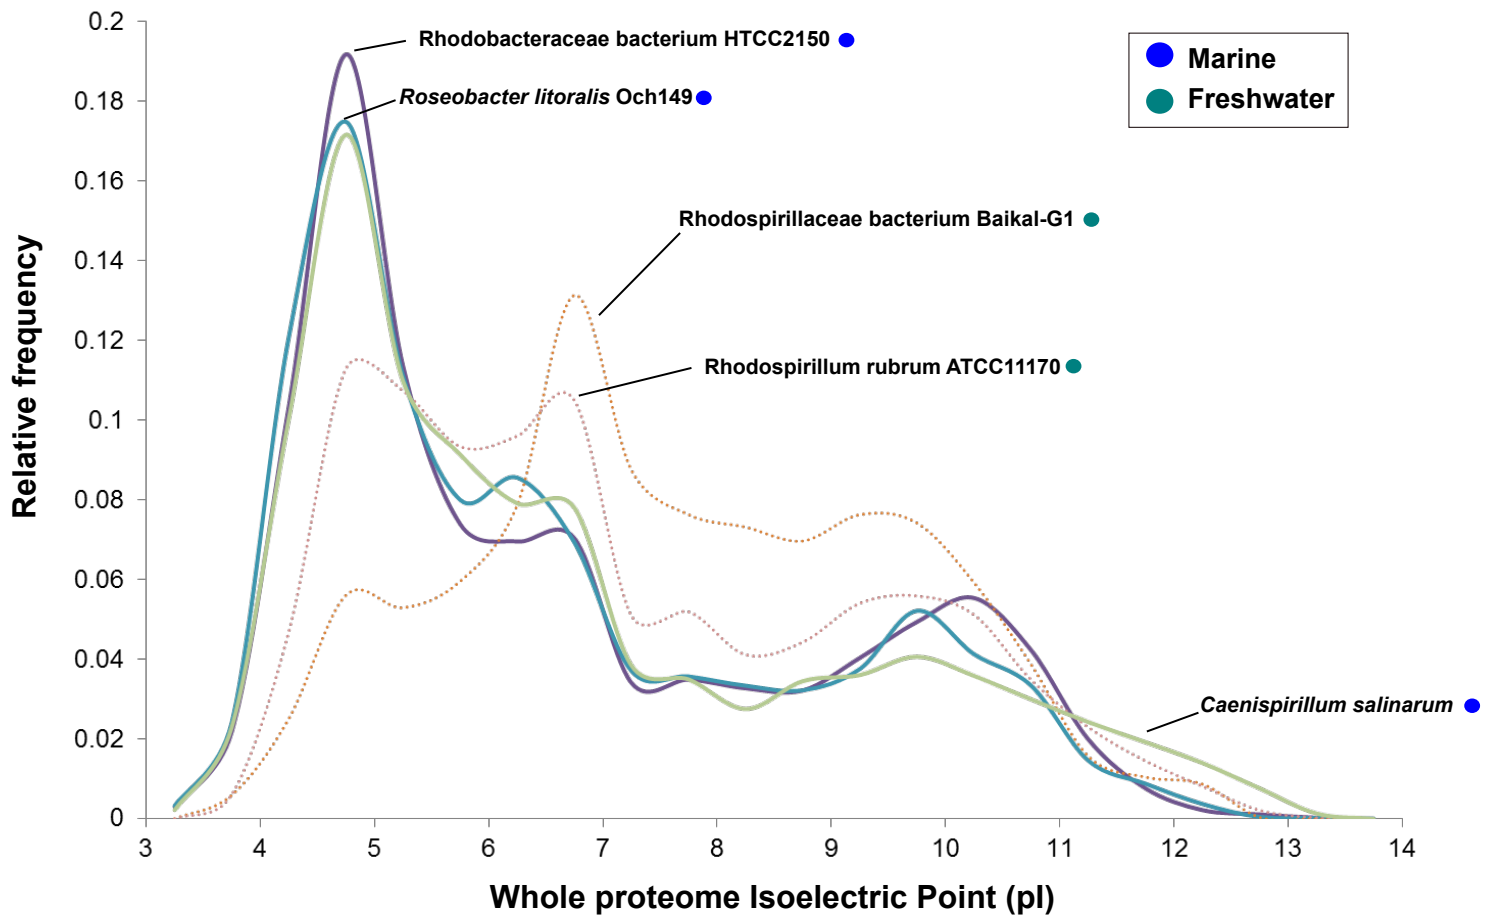**B**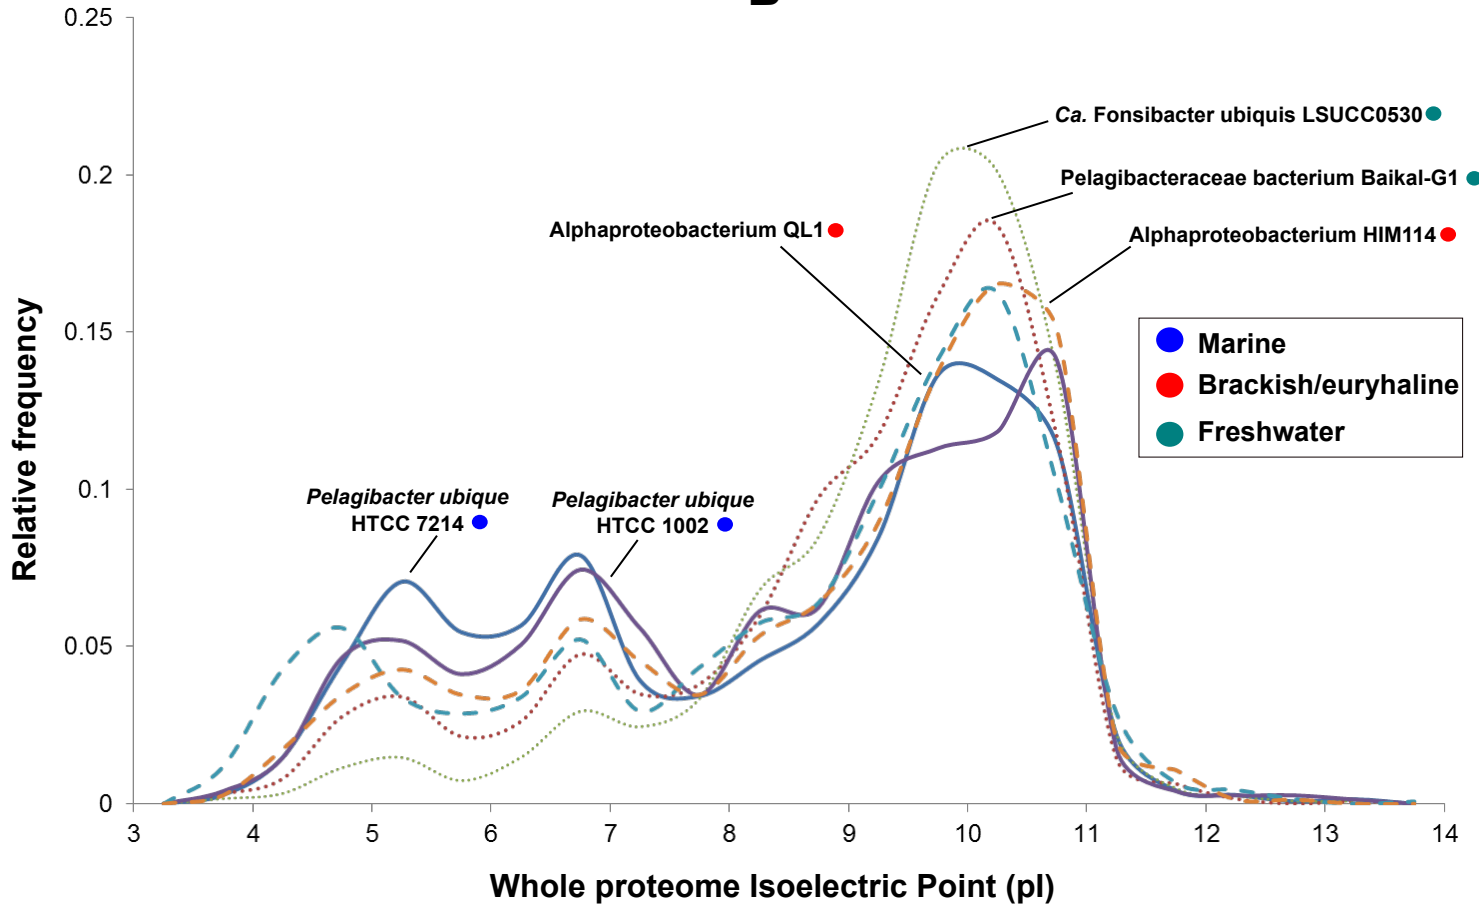

**Figure S1.** Whole proteome pI versus relative frequency plot of some representatives from different habitats of the class Alphaproteobacteria. A) Rhodospirillaceae and *Roseobacter* clades and B) SAR11 clade.

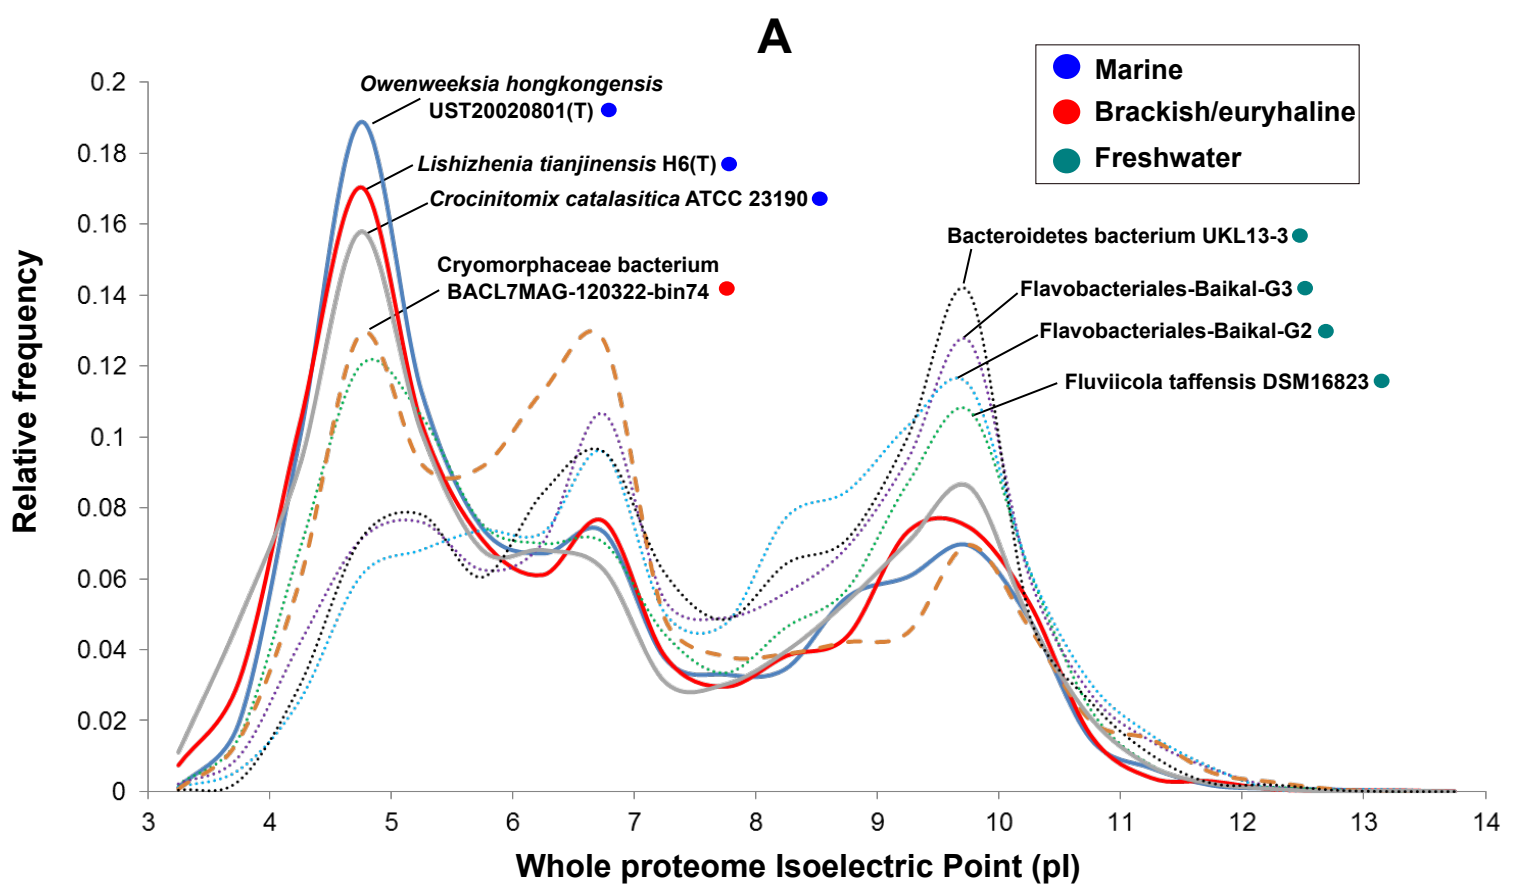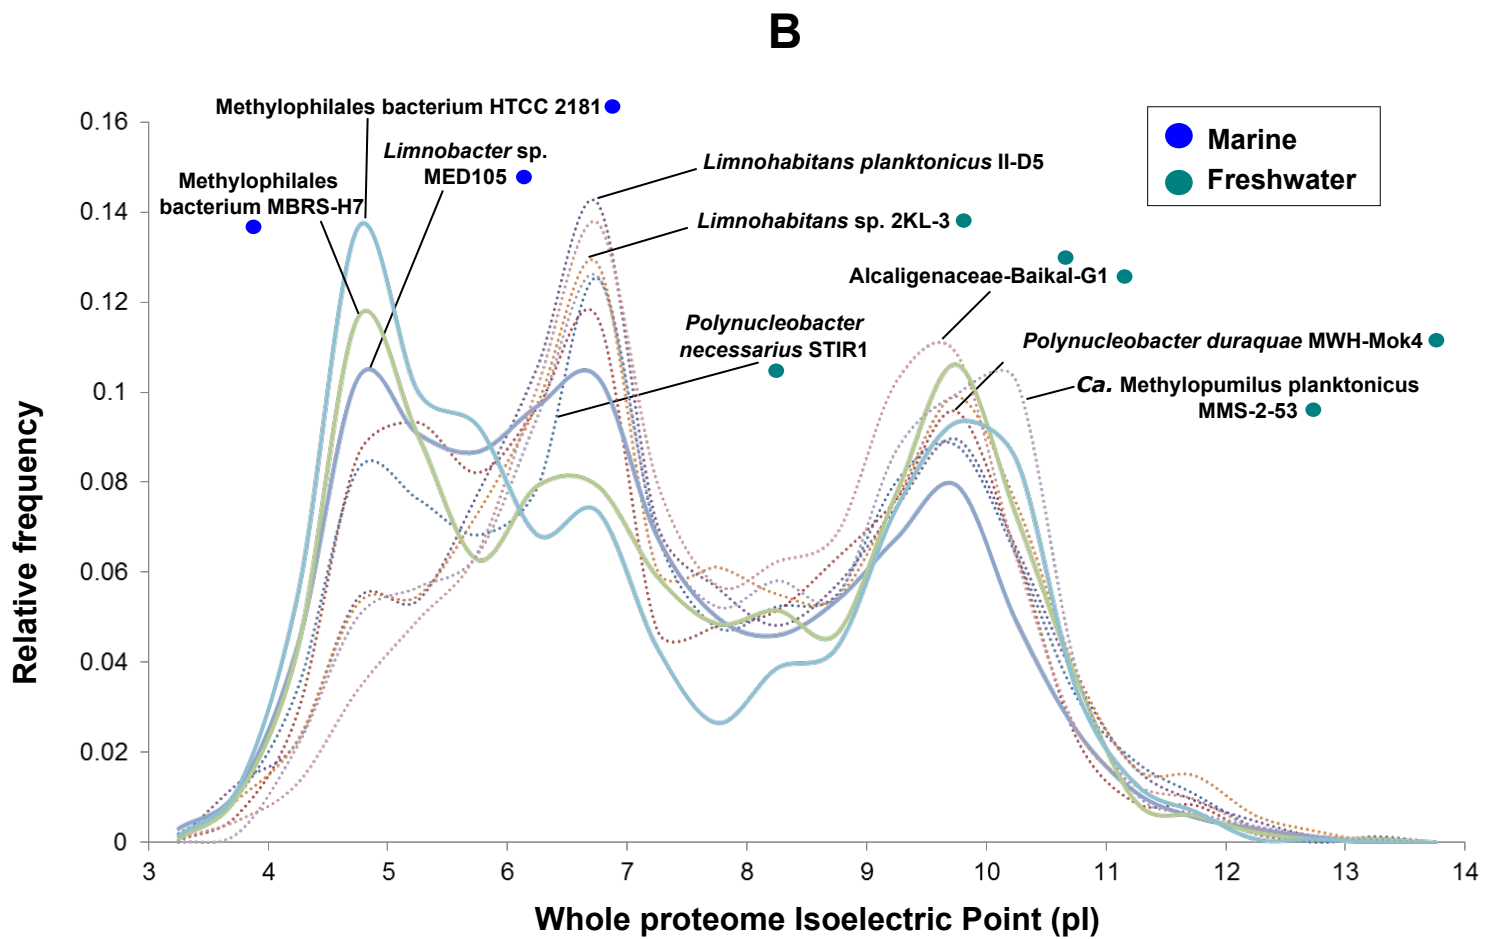

**Figure S2.** Whole proteome pI versus relative frequency plot of some representatives from different habitats of A) phylum Bacteroidetes and B) Order Betaproteobacteriales.

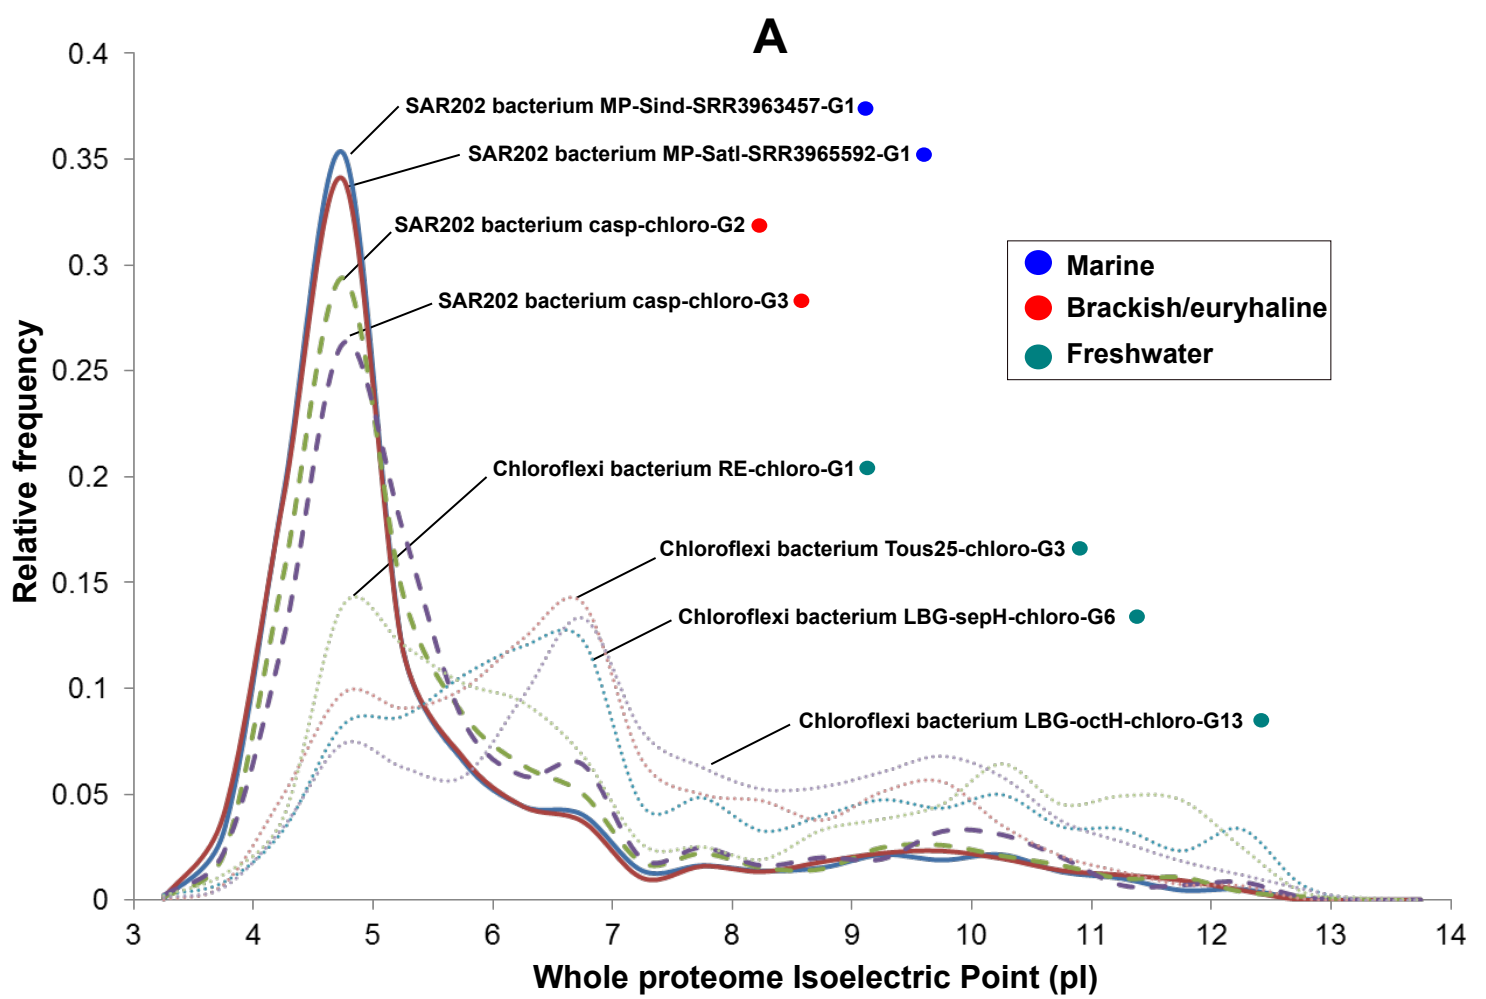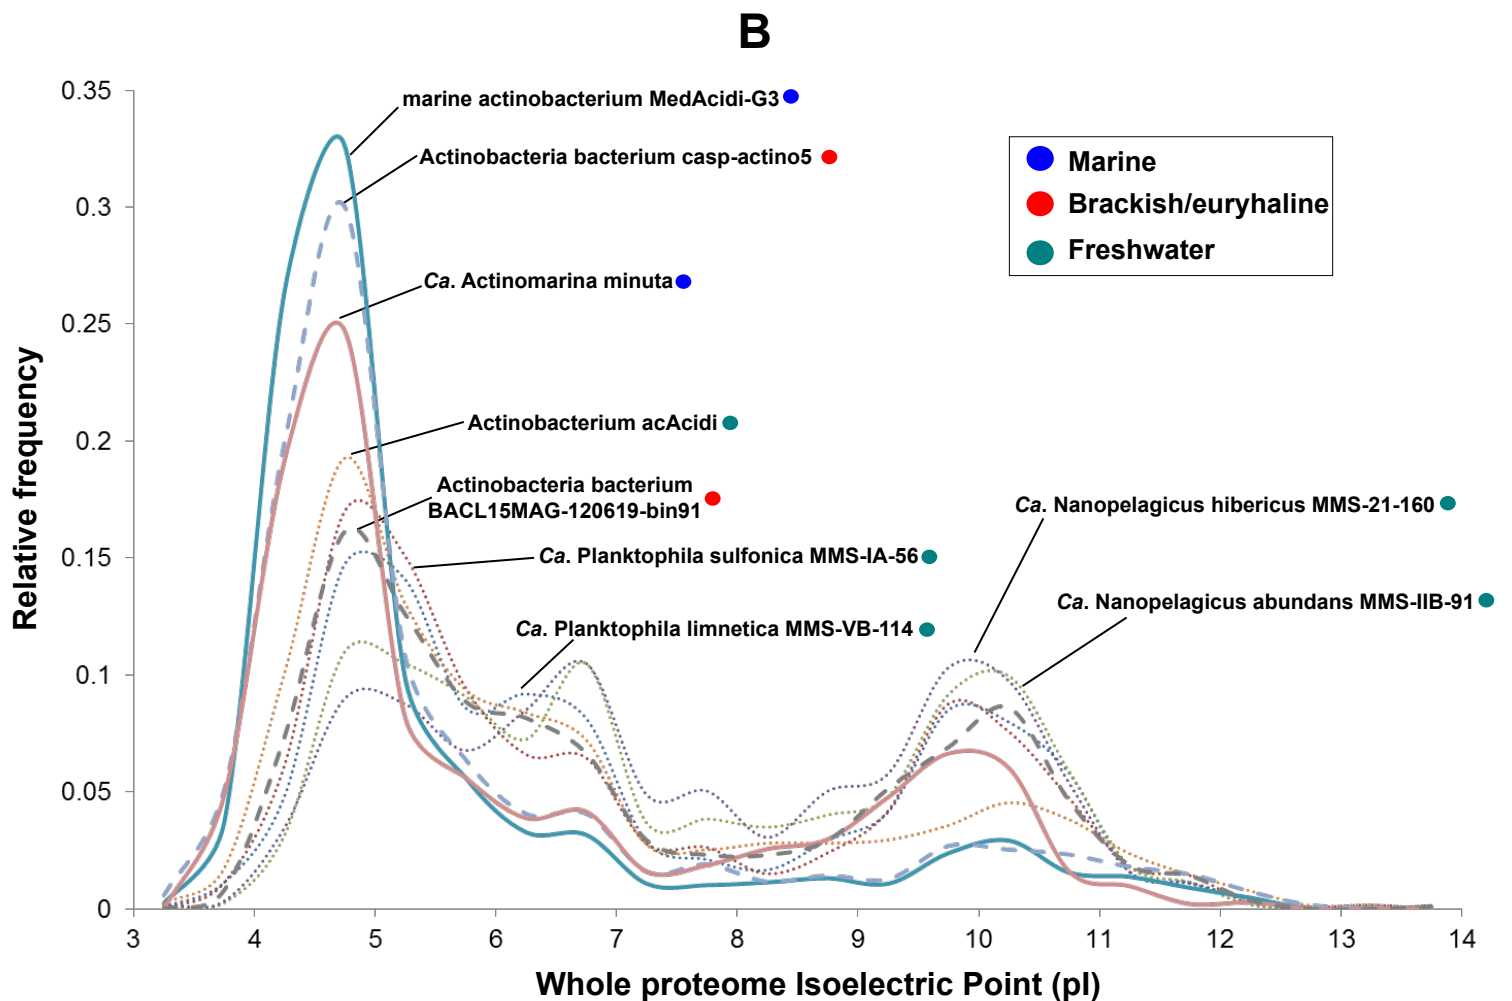

**Figure S3.** Whole proteome pI versus relative frequency plot of some representatives from different habitats of A) phylum Chloroflexi and B) phylum Actinobacteria.

**A**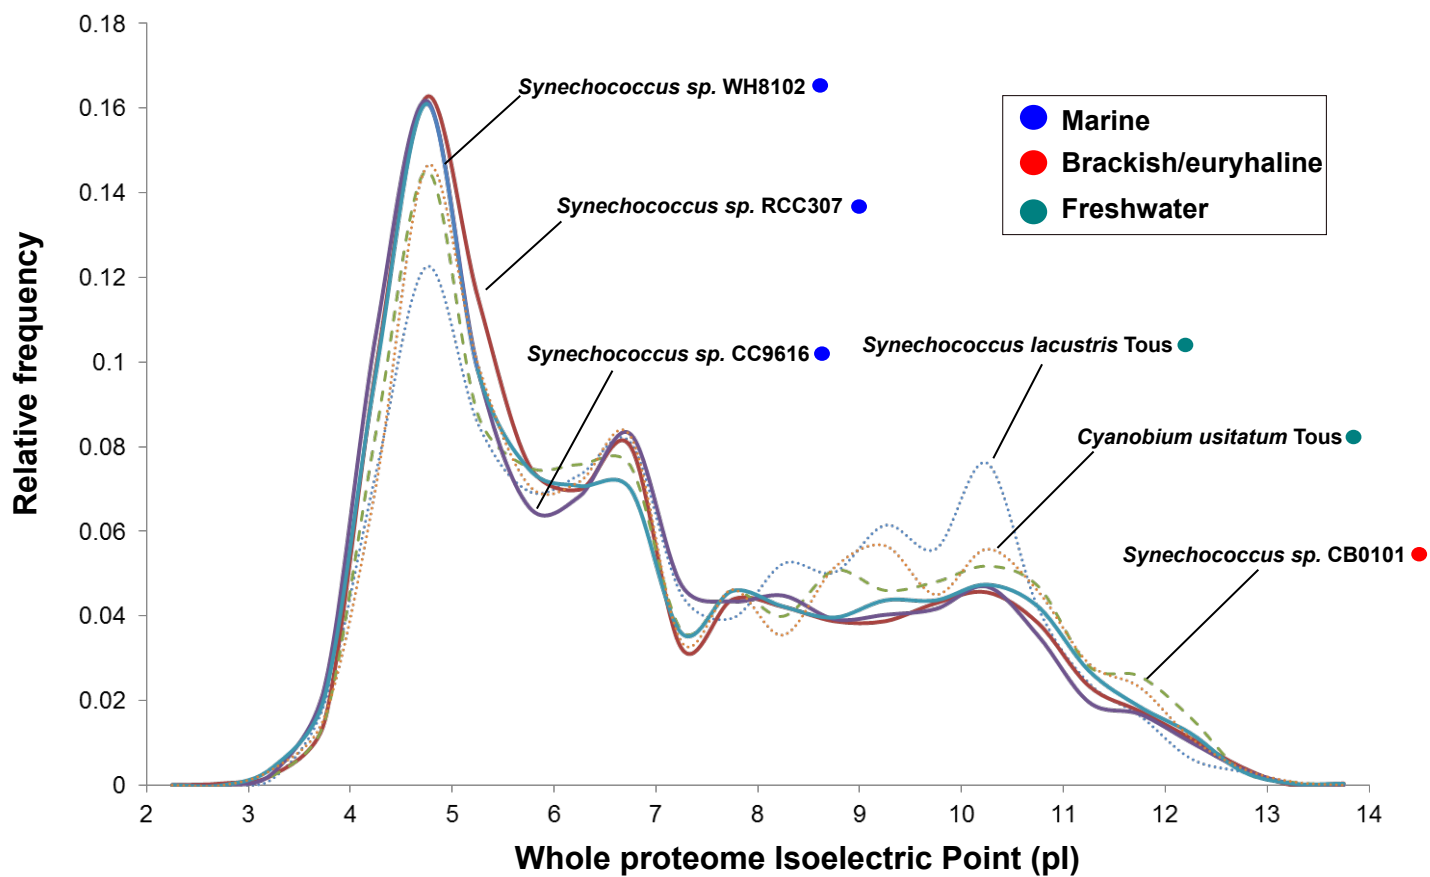**B**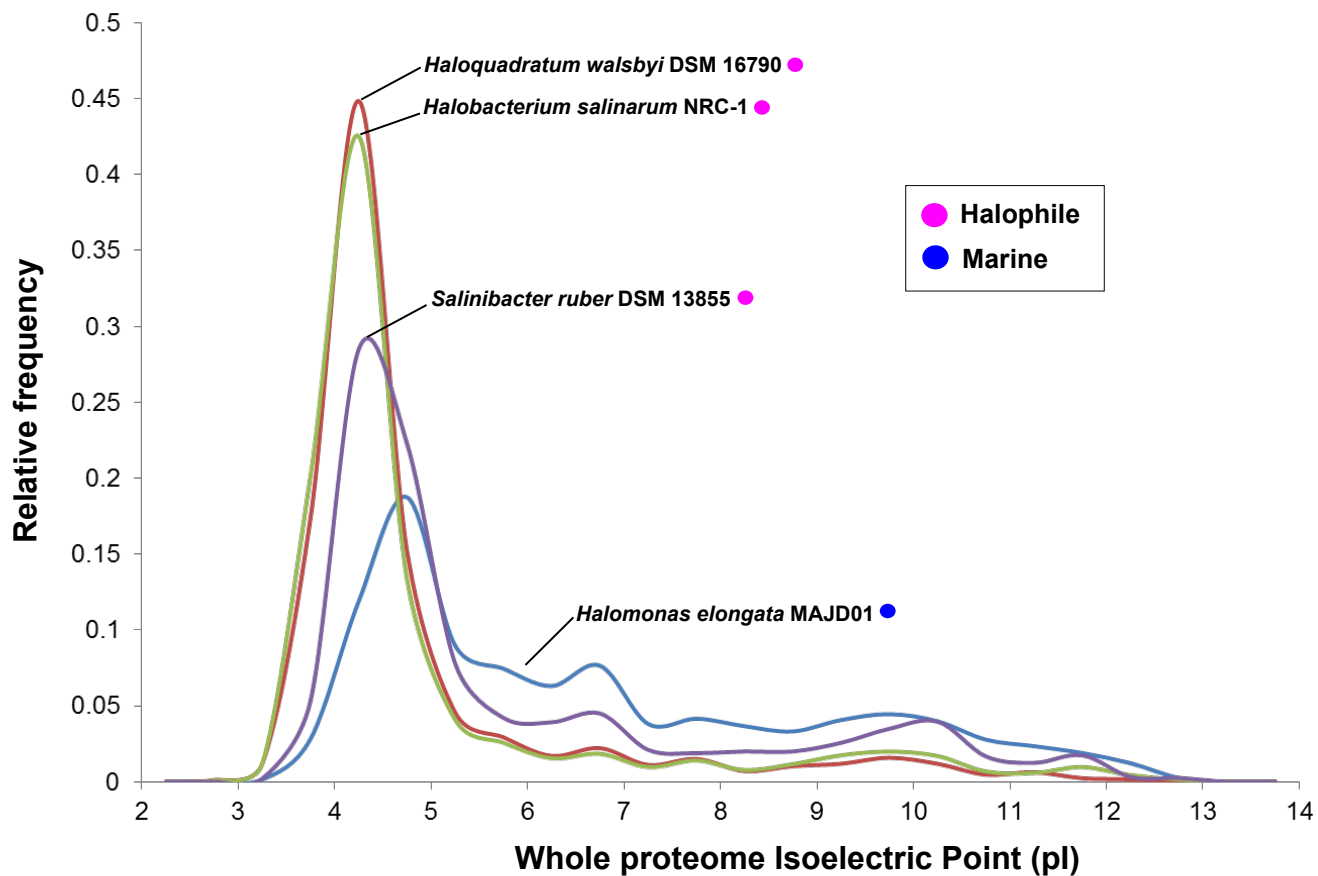

**Figure S4.** Whole proteome pI versus relative frequency plot of some representatives from different habitats of A) Genera *Synechococcus*/*Cyanobium* and B) Assorted halophiles (bacteria and archaea).

**A**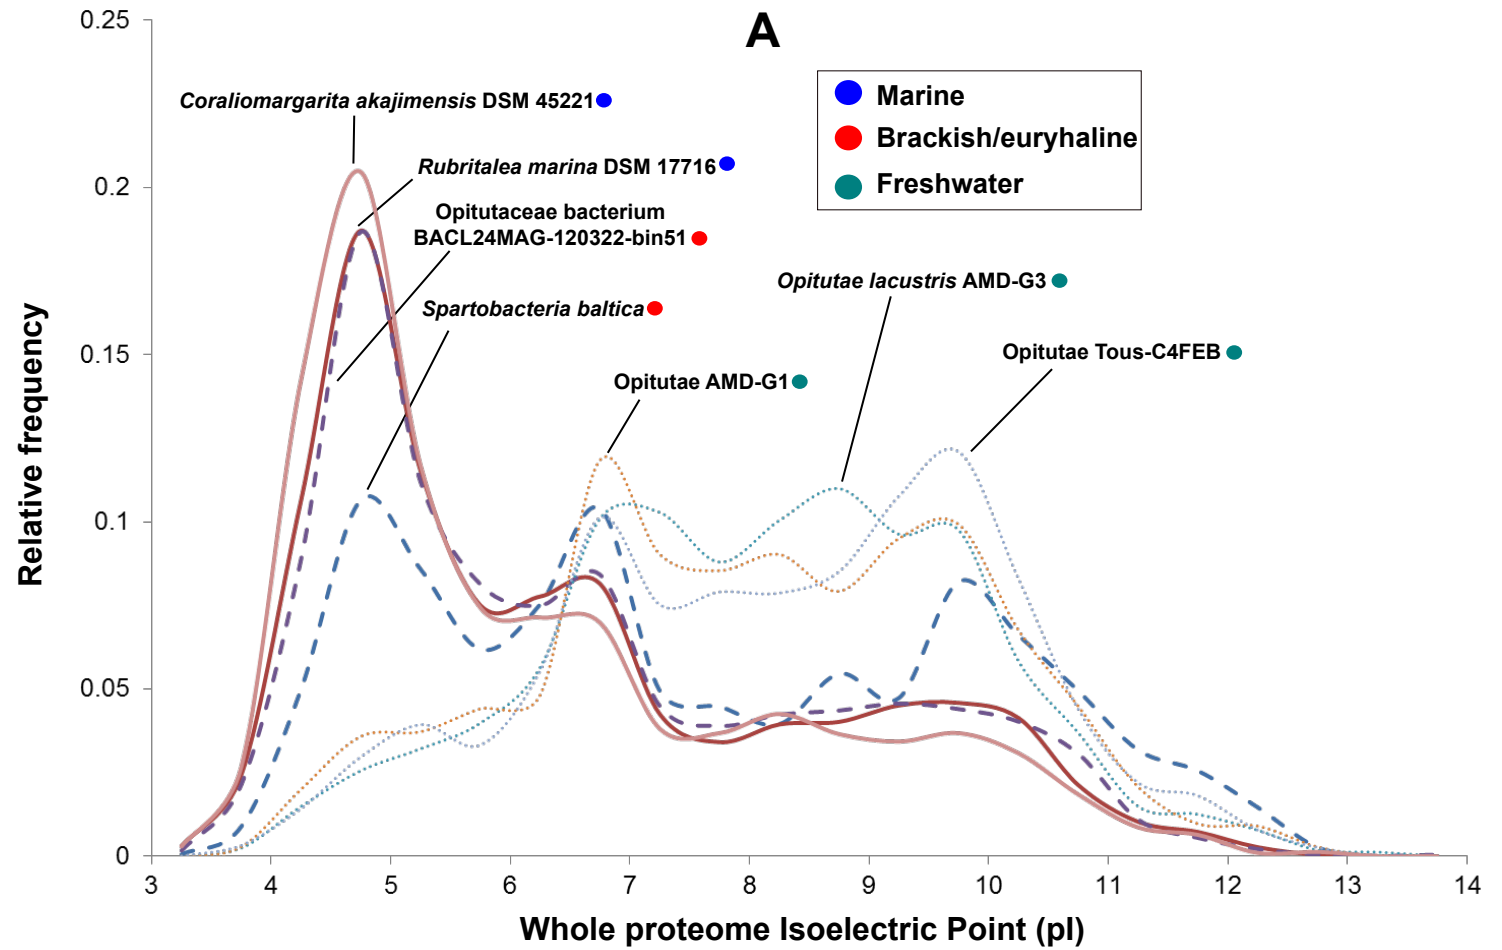**B**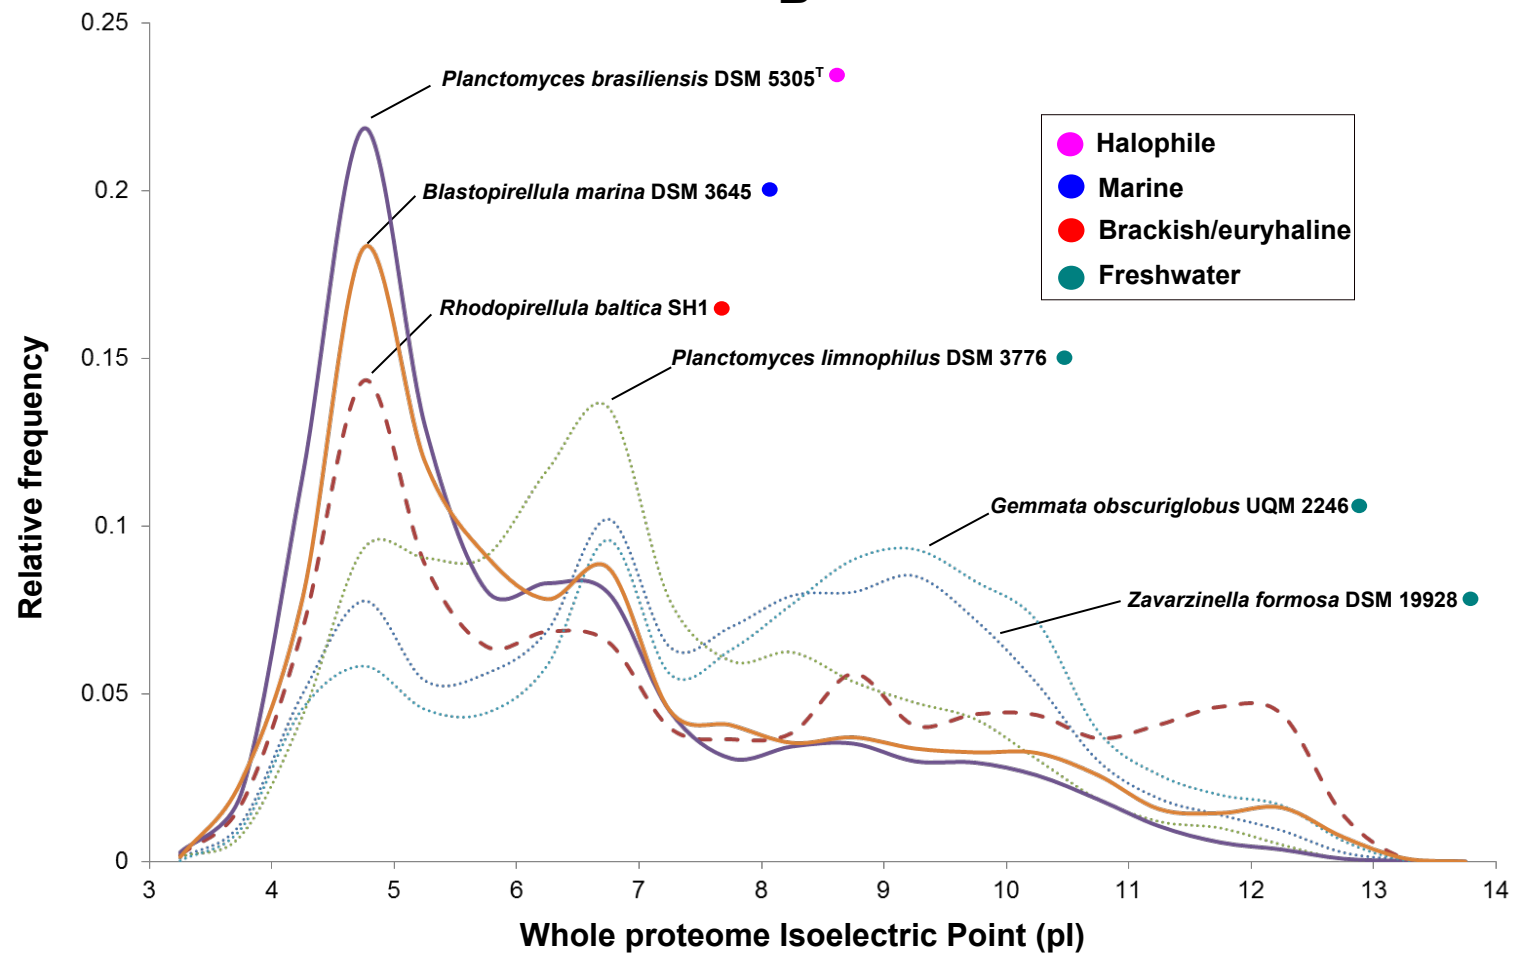

**Figure S5.** Whole proteome pI versus relative frequency plot of some representatives from different habitats of A) phylum Verrucomicrobia and B) phylum Planctomycetes.

**A**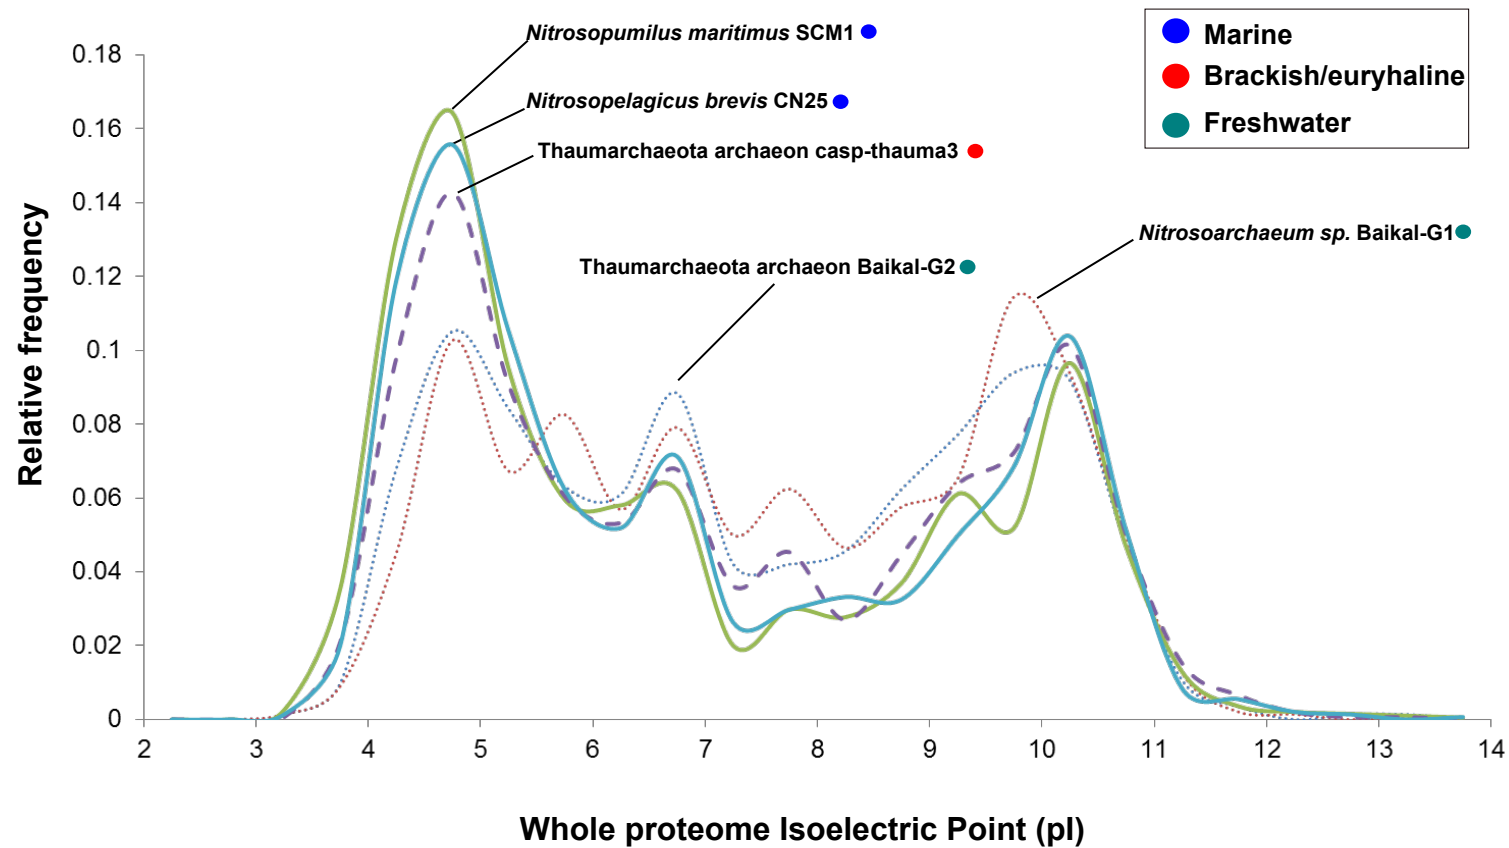

**Figure S6.** Whole proteome pI versus relative frequency plot of some representatives from different habitats of the phylum Thaumarchaeota.

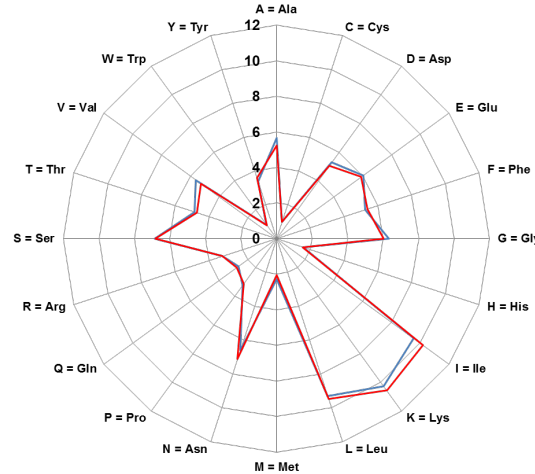

**Pelagibacteraceae Baikal-G1**

**Pelagibacter ubique HTCC 7214**

| Property  | Residues                | Pubique HTCC 7214 (Mole %) | Pelagibacteraceae Baikal-G1 (Mole %) |
|-----------|-------------------------|----------------------------|--------------------------------------|
| Tiny      | (A+C+G+S+T)             | 24.889                     | 23.791                               |
| Small     | (A+B+C+D+G+N+P+S+T+V)   | 45.48                      | 44.387                               |
| Aliphatic | (A+H+L+V)               | 30.134                     | 30.152                               |
| Aromatic  | (F+H+W+Y)               | 11.187                     | 11.433                               |
| Non-polar | (A+C+F+G+H+L+M+P+V+W+Y) | 52.627                     | 52.274                               |
| Polar     | (D+E+H+K+N+Q+R+S+T+Z)   | 47.373                     | 47.726                               |
| Charged   | (B+D+E+H+K+R+Z)         | 26.407                     | 26.294                               |
| Basic     | (H+K+R)                 | 15.069                     | 15.327                               |
| Acidic    | (B+D+E+Z)               | 11.338                     | 10.967                               |

| Amino acid | <i>Pubique</i> HTCC 7214 (Mole %) | Pelagibacteraceae Baikal-G1 (Mole %) |
|------------|-----------------------------------|--------------------------------------|
| A = Ala    | 5.652                             | 5.221                                |
| C = Cys    | 1.001                             | 0.989                                |
| D = Asp    | 5.302                             | 5.07                                 |
| E = Glu    | 6.036                             | 5.897                                |
| F = Phe    | 5.252                             | 5.398                                |
| G = Gly    | 6.33                              | 6.035                                |
| H = His    | 1.593                             | 1.555                                |
| I = Ile    | 9.552                             | 10.191                               |
| K = Lys    | 10.28                             | 10.565                               |
| L = Leu    | 9.317                             | 9.472                                |
| M = Met    | 2.291                             | 2.069                                |
| N = Asn    | 6.599                             | 7.107                                |
| P = Pro    | 3.277                             | 3.151                                |
| Q = Gln    | 2.66                              | 2.78                                 |
| R = Arg    | 3.196                             | 3.208                                |
| S = Ser    | 6.869                             | 6.817                                |
| T = Thr    | 4.838                             | 4.728                                |
| V = Val    | 5.613                             | 5.268                                |
| W = Trp    | 0.968                             | 0.905                                |
| Y = Tyr    | 3.374                             | 3.575                                |

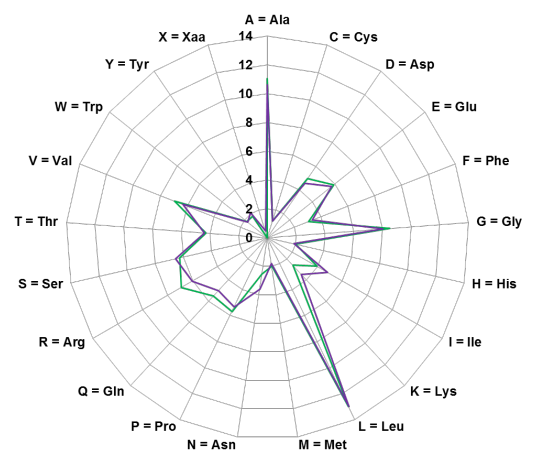

**Synechococcus lacustris Tous**

**Synechococcus sp. RCC307**

| Property  | Residues                | <i>Synechococcus</i> sp. RCC 307 (Mole %) | <i>Synechococcus lacustris</i> Tous (Mole %) |
|-----------|-------------------------|-------------------------------------------|----------------------------------------------|
| Tiny      | (A+C+G+S+T)             | 31.323                                    | 30.845                                       |
| Small     | (A+B+C+D+G+N+P+S+T+V)   | 51.438                                    | 50.679                                       |
| Aliphatic | (A+H+L+V)               | 34.943                                    | 34.77                                        |
| Aromatic  | (F+H+W+Y)               | 8.7                                       | 9.042                                        |
| Non-polar | (A+C+F+G+H+L+M+P+V+W+Y) | 59.039                                    | 58.322                                       |
| Polar     | (D+E+H+K+N+Q+R+S+T+Z)   | 40.961                                    | 41.204                                       |
| Charged   | (B+D+E+H+K+R+Z)         | 22.394                                    | 21.638                                       |
| Basic     | (H+K+R)                 | 11.53                                     | 11.363                                       |
| Acidic    | (B+D+E+Z)               | 10.865                                    | 10.275                                       |

| Amino acid | <i>Synechococcus</i> sp. RCC 307 | <i>Synechococcus lacustris</i> Tous |
|------------|----------------------------------|-------------------------------------|
| A = Ala    | 11.07                            | 10.624                              |
| C = Cys    | 1.219                            | 1.222                               |
| D = Asp    | 4.959                            | 4.592                               |
| E = Glu    | 5.906                            | 5.683                               |
| F = Phe    | 3.057                            | 3.325                               |
| G = Gly    | 8.509                            | 8.043                               |
| H = His    | 2.016                            | 1.873                               |
| I = Ile    | 3.953                            | 4.796                               |
| K = Lys    | 2.61                             | 3.463                               |
| L = Leu    | 12.985                           | 13.017                              |
| M = Met    | 1.992                            | 1.802                               |
| N = Asn    | 2.527                            | 3.607                               |
| P = Pro    | 5.692                            | 5.316                               |
| Q = Gln    | 5.513                            | 5.003                               |
| R = Arg    | 6.904                            | 6.027                               |
| S = Ser    | 6.244                            | 6.546                               |
| T = Thr    | 4.282                            | 4.41                                |
| V = Val    | 6.936                            | 6.319                               |
| W = Trp    | 1.814                            | 1.749                               |
| Y = Tyr    | 1.813                            | 2.094                               |
| X = Xaa    | 0                                | 0.474                               |

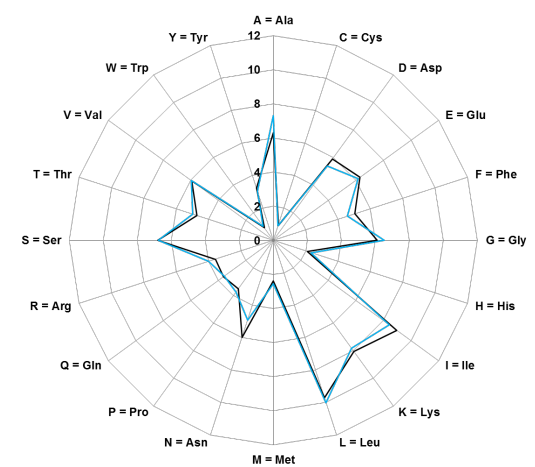

**Methylophilus planktonicus MMS-2-53**

**Methylophilales bacterium MBRS-H7**

| Property  | Residues                | Methylophilales bacterium MBRS H7 (Mole%) | <i>Methylophilus planktonicus</i> MMS-2-53 (Mole%) |
|-----------|-------------------------|-------------------------------------------|----------------------------------------------------|
| Tiny      | (A+C+G+S+T)             | 24.848                                    | 26.443                                             |
| Small     | (A+B+C+D+G+N+P+S+T+V)   | 46.146                                    | 46.476                                             |
| Aliphatic | (A+H+L+V)               | 30.884                                    | 31.73                                              |
| Aromatic  | (F+H+W+Y)               | 11.257                                    | 10.982                                             |
| Non-polar | (A+C+F+G+H+L+M+P+V+W+Y) | 52.989                                    | 54.054                                             |
| Polar     | (D+E+H+K+N+Q+R+S+T+Z)   | 47.011                                    | 45.946                                             |
| Charged   | (B+D+E+H+K+R+Z)         | 25.896                                    | 25.722                                             |
| Basic     | (H+K+R)                 | 13.716                                    | 14.161                                             |
| Acidic    | (B+D+E+Z)               | 12.18                                     | 11.561                                             |

| Amino acid | Methylophilales bacterium MBRS H7 | <i>Methylophilus planktonicus</i> MMS-2-53 |
|------------|-----------------------------------|--------------------------------------------|
| A = Ala    | 6.294                             | 7.302                                      |
| C = Cys    | 0.92                              | 0.887                                      |
| D = Asp    | 5.891                             | 5.396                                      |
| E = Glu    | 6.289                             | 6.166                                      |
| F = Phe    | 5.047                             | 4.587                                      |
| G = Gly    | 6.117                             | 6.506                                      |
| H = His    | 2.085                             | 2.341                                      |
| I = Ile    | 8.965                             | 8.437                                      |
| K = Lys    | 8.045                             | 7.824                                      |
| L = Leu    | 9.695                             | 10.021                                     |
| M = Met    | 2.393                             | 2.538                                      |
| N = Asn    | 5.974                             | 4.915                                      |
| P = Pro    | 3.503                             | 3.752                                      |
| Q = Gln    | 3.624                             | 3.561                                      |
| R = Arg    | 3.587                             | 3.996                                      |
| S = Ser    | 6.805                             | 6.758                                      |
| T = Thr    | 4.713                             | 4.99                                       |
| V = Val    | 5.929                             | 5.97                                       |
| W = Trp    | 0.91                              | 1.024                                      |
| Y = Tyr    | 3.215                             | 3.029                                      |

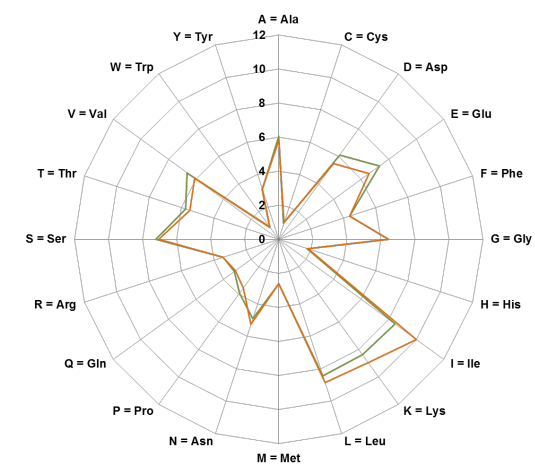

**Nitrosoarchaeum sp. Baikal-G1**

**Nitrosopumilus maritimus SCM1**

| Property  | Residues                | <i>Nitrosopumilus maritimus</i> SCM1 | <i>Nitrosoarchaeum</i> sp. Baikal-G1 |
|-----------|-------------------------|--------------------------------------|--------------------------------------|
| Tiny      | (A+C+G+S+T)             | 26.42                                | 25.853                               |
| Small     | (A+B+C+D+G+N+P+S+T+V)   | 47.982                               | 46.256                               |
| Aliphatic | (A+H+L+V)               | 29.586                               | 30.748                               |
| Aromatic  | (F+H+W+Y)               | 10.147                               | 10.168                               |
| Non-polar | (A+C+F+G+H+L+M+P+V+W+Y) | 51.899                               | 52.774                               |
| Polar     | (D+E+H+K+N+Q+R+S+T+Z)   | 48.101                               | 47.218                               |
| Charged   | (B+D+E+H+K+R+Z)         | 27.047                               | 26.295                               |
| Basic     | (H+K+R)                 | 13.586                               | 14.204                               |
| Acidic    | (B+D+E+Z)               | 13.461                               | 12.091                               |

| Amino acid | <i>Nitrosopumilus maritimus</i> SCM1 | <i>Nitrosoarchaeum</i> sp. Baikal-G1 |
|------------|--------------------------------------|--------------------------------------|
| A = Ala    | 6.055                                | 5.792                                |
| C = Cys    | 0.983                                | 1.056                                |
| D = Asp    | 6.124                                | 5.509                                |
| E = Glu    | 7.337                                | 6.582                                |
| F = Phe    | 4.403                                | 4.382                                |
| G = Gly    | 6.445                                | 6.47                                 |
| H = His    | 1.772                                | 1.824                                |
| I = Ile    | 8.461                                | 10.006                               |
| K = Lys    | 8.393                                | 8.952                                |
| L = Leu    | 8.432                                | 8.855                                |
| M = Met    | 2.606                                | 2.611                                |
| N = Asn    | 4.896                                | 5.255                                |
| P = Pro    | 3.904                                | 3.544                                |
| Q = Gln    | 3.222                                | 3.133                                |
| R = Arg    | 3.42                                 | 3.428                                |
| S = Ser    | 7.199                                | 7.05                                 |
| T = Thr    | 5.738                                | 5.485                                |
| V = Val    | 6.638                                | 6.095                                |
| W = Trp    | 0.894                                | 0.855                                |
| Y = Tyr    | 3.078                                | 3.108                                |

**Figure S7.** Star diagrams and amino acid composition of prokaryotic relatives from marine and freshwater origin.



● Halophile ● Marine ● Freshwater

radA (pI = 4.4)  
*Haloquadratum walsbyi* DSM 16790 ●

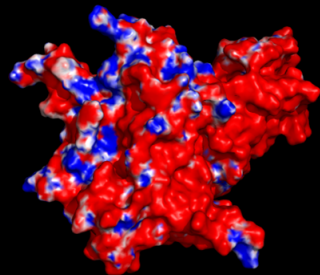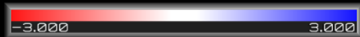

radA (pI = 6.1)  
*Nitrosopumilus maritimus* SCM1 ●

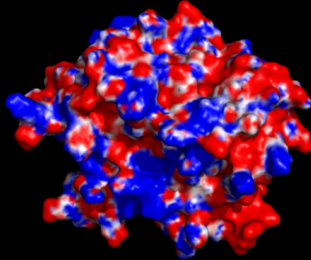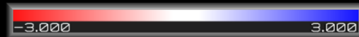

radA (pI = 9.7)  
*Nitrosoarchaeum-Baikal-G1* ●

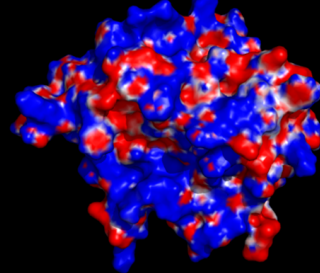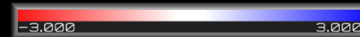

N5-carboxyaminoimidazole ribonucleotide synthetase (pI = 4.2)

*Haloquadratum walsbyi* DSM 16790 ●

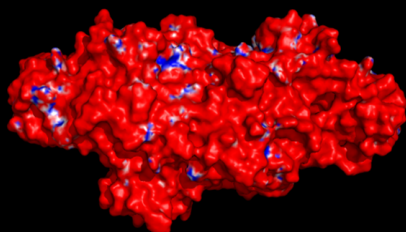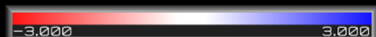

N5-carboxyaminoimidazole ribonucleotide synthetase (pI = 5.3)

*Nitrosopumilus maritimus* SCM1 ●

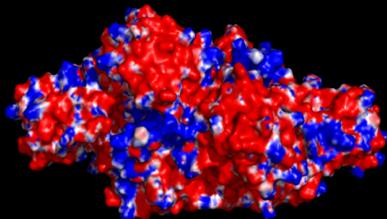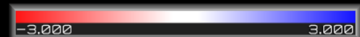

N5-carboxyaminoimidazole ribonucleotide synthetase (pI = 9)

*Nitrosoarchaeum-Baikal-G1* ●

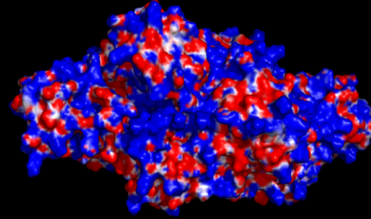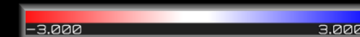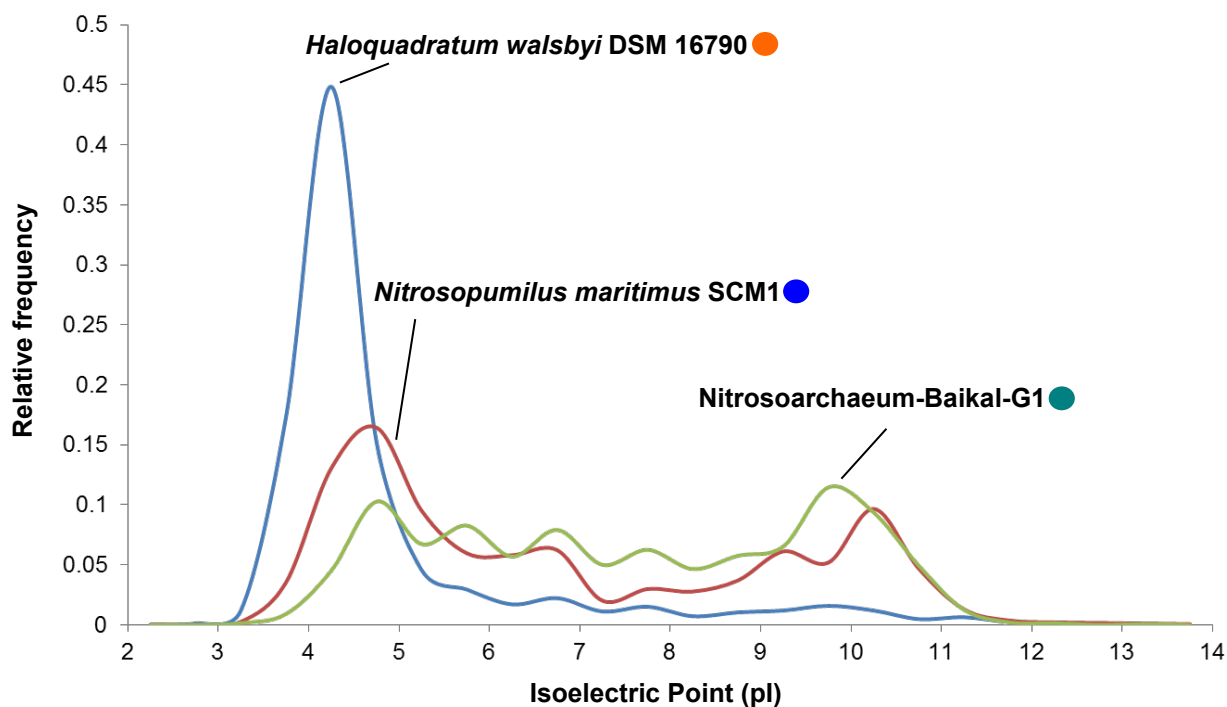

**Figure S8.** Structural model of proteins from different habitat-adapted archaea. Insets show electrostatic surface potential 3D models of N5-carboxyaminoimidazole ribonucleotide synthetase (secreted protein) and radA (cytoplasmic). The potentials were coloured from -3 kcal mol<sup>-1</sup> (red) to +3 kcal mol<sup>-1</sup> (blue). Whole proteome pI versus relative frequency plot of *Haloquadratum walsbyi* DSM 16790 (halophile, culture), *Nitrosopumilus maritimus* SCM1 (marine, culture), *Nitrosoarchaeum* sp. Baikal-G1 (freshwater, MAG).

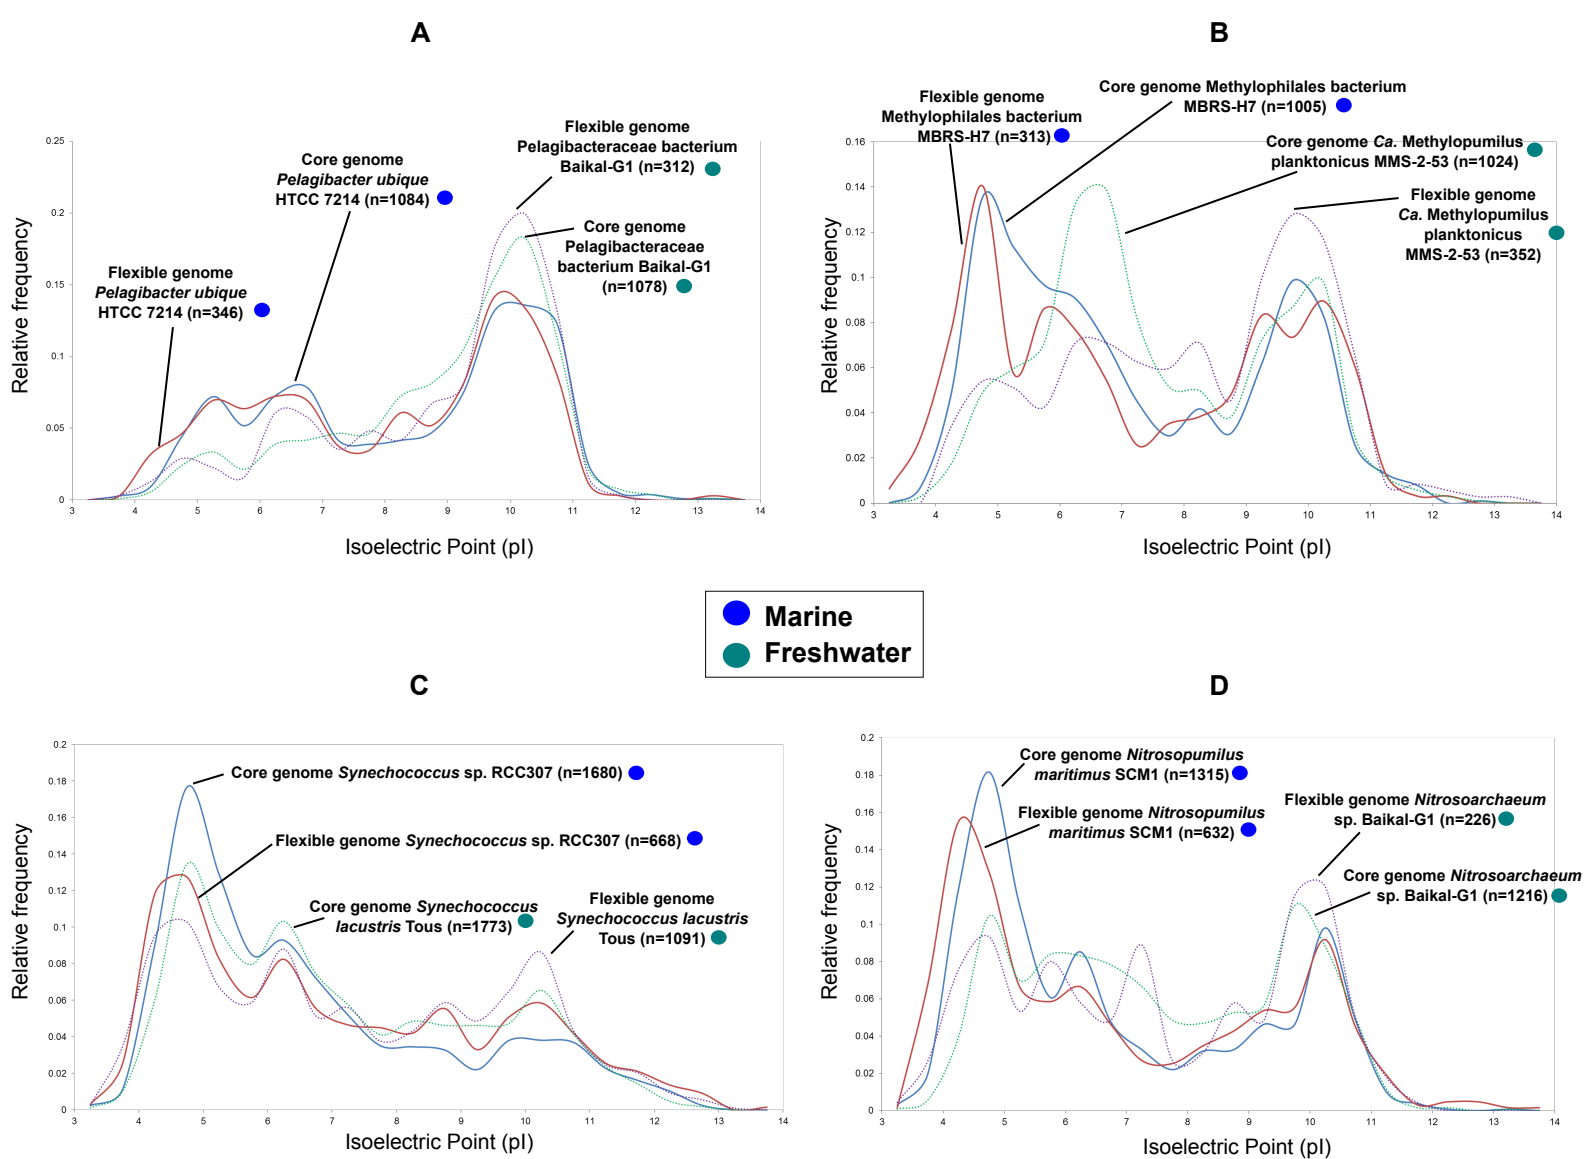

**Figure S9.** Isoelectric point versus relative frequency plot of the pan-genome (core and flexible genome) of freshwater and marine prokaryotes. N indicates the number of proteins in either core or flexible genomes. A) *P.ubique* HTCC 7214 and *Pelagibacteraceae* bacterium Baikal-G1. B) *Ca. Methylophilus planktonicus* MMS-2-53 and *Methylophilales* bacterium MBRS-H7. C) *Synechococcus* sp. RCC307 and *Synechococcus lacustris* Tous. D) *Nitrosopumilus maritimus* SCM1 and *Nitrosoarchaeum* sp. Baikal-G1.

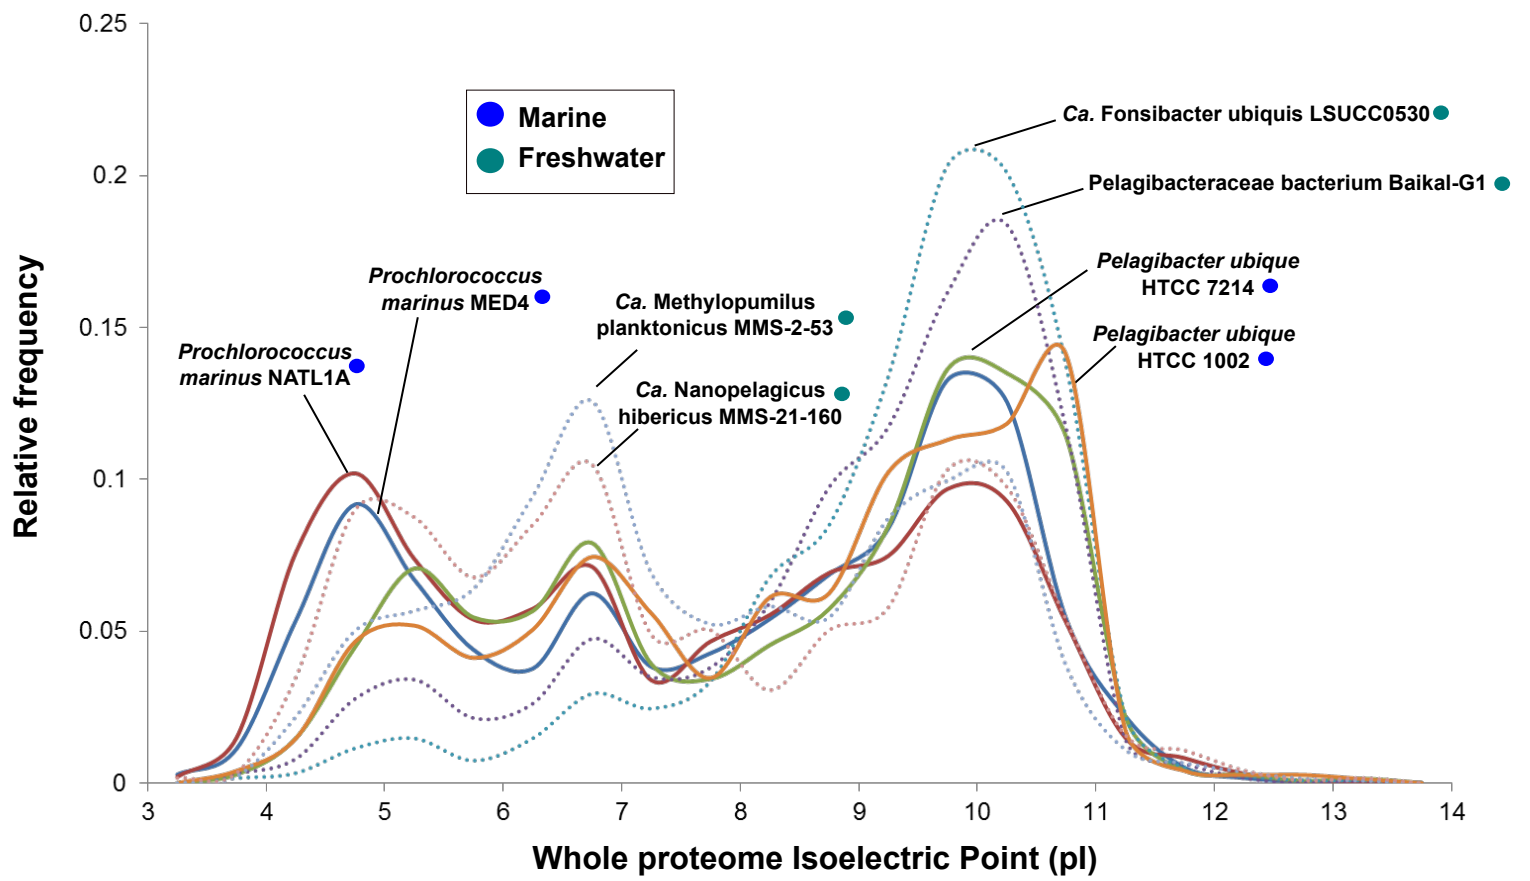

**Figure S10.** Whole proteome pI versus relative frequency plot of some streamlined bacteria from different habitats.
